# Supplementary material for: Thermally responsive vesicles based on a mixture of cationic surfactant and organic derivative below the CMC
Source: Royal Society of Chemistry journal article supplement (doi:10.1039/c1sm06169k), 2011-01-01
Supplement: c1sm06169k.pdf [file c1sm06169k.pdf]

# Supplementary Information

## Thermally Responsive Vesicles Based on a Mixture of Cationic Surfactant and Organic Derivative below CMC

Tae-Hwan Kim\*, Young-Soo Han, Baek-Seok Seong, and Kwang-Pyo Hong

### SANS Analysis Model

Since the SANS experiments were performed in dilute solutions of particles, the interparticle interactions are negligible. Therefore, the scattering intensity can be simplified as

$$I(q) = nP(q) + b$$

where  $n$  is the number of density of particles,  $P(q)$  is the intraparticle interference (called the form factor), and  $b$  is the residual incoherent scattering. Here we used vesicular form factor averaged over a Schulz distribution of core radius. The Schulz width parameter is given as  $z = 1/p^2 - 1$ , where  $p$  is the polydispersity ( $= \sigma_r/r$ ). The form factor for the vesicular structures is given as<sup>1</sup>

$$P(q) = \frac{1}{V_s} \left[ \frac{3V_c(\rho_c - \rho_s)j_1(qr_c)}{qr_c} + \frac{3V_s(\rho_s - \rho_{\text{soln}})j_1(qr_s)}{qr_s} \right]$$

where  $r_c$  and  $t$  are the core radius and shell thickness of vesicles, respectively.  $\rho_c$ ,  $\rho_s$ , and  $\rho_{\text{soln}}$  are scattering length densities of the core, shell, and solvent, respectively.  $j_1 = (\sin x - x \cos x)/x^2$ ,  $r_s = r_c + t$ ,  $V_s = \left(\frac{4\pi}{3}\right)r_s^3$ ,  $V_c = \left(\frac{4\pi}{3}\right)\langle r_c^3 \rangle$ , and  $\langle r_c^3 \rangle = \frac{(z+3)(z+2)}{(z+1)^2} \langle r_c \rangle$ .

## DLS measurements of the 5mS/DTAB mixture solution with 4.5mM/6.25mM and 11mM/12.5mM

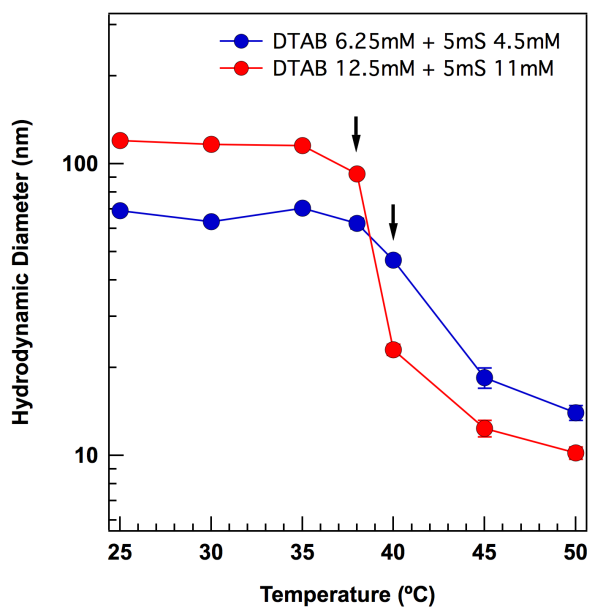

**Figure S1.** DLS measurements of the 5mS/DTAB mixture solution at varying temperature.

### Reference

- 1 A. Guiner, G. Fournet, “*Small Angle Scattering of X-Rays*”, John Wiley and Sons, New York 1995.
